# Supplementary material for: Microwave-enhanced radical reactions at ambient temperature : Part 3: Highly selective radical synthesis of 3-cyclohexyl-1-phenyl-1-butanone in a microwave double cylindrical cooled reactor
Source: Royal Society of Chemistry journal article supplement (doi:10.1039/b810142f), 2008-01-01
Supplement: b810142f.pdf [file b810142f.pdf]

**Electronic Supplementary Information**

**Microwave-enhanced radical reactions at ambient temperature. 3.  
Highly selective radical synthesis of 3-cyclohexyl-1-phenyl-1-butanone in  
a microwave double cylindrical cooled reactor**

Satoshi Horikoshi,<sup>a b\*</sup> Junichi Tsuzuki,<sup>a</sup> Masatsugu Kajitani,<sup>a</sup> Masahiko Abe,<sup>c</sup> and Nick Serpone<sup>d \*</sup>

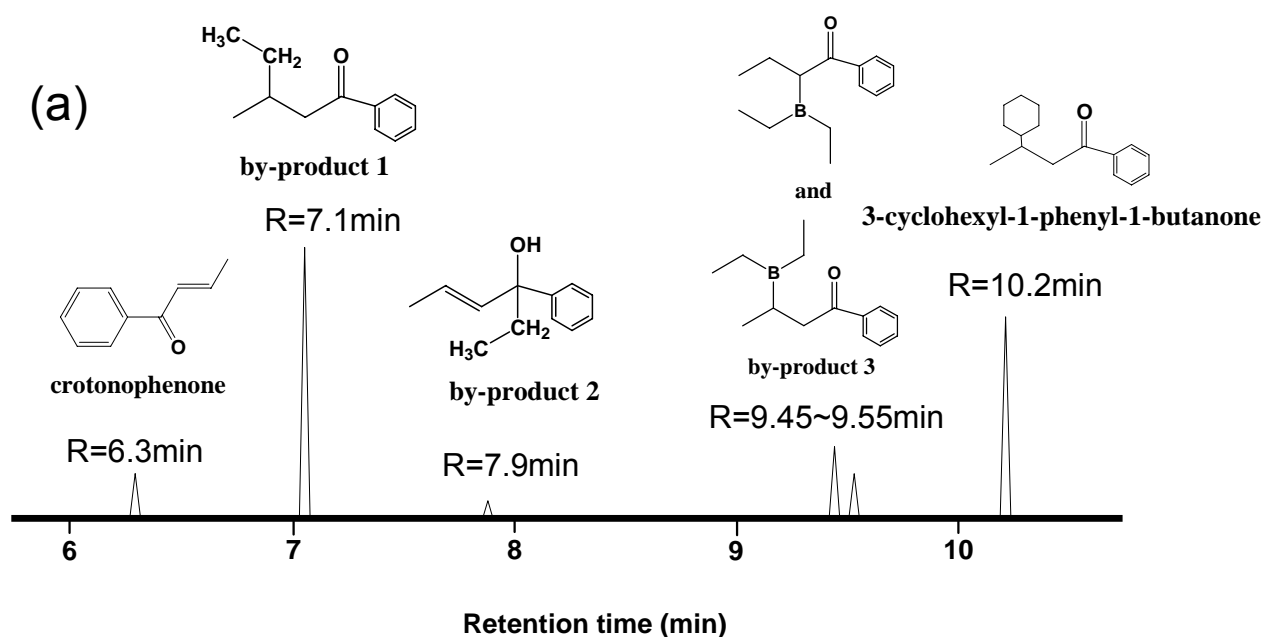

**Figure S1a** – Gas chromatogram of reactants and products from the synthesis of 3-cyclohexyl-1-phenyl-1-butanone (CPB) by the microwave irradiation alone (MW protocol) after a 120-min period.

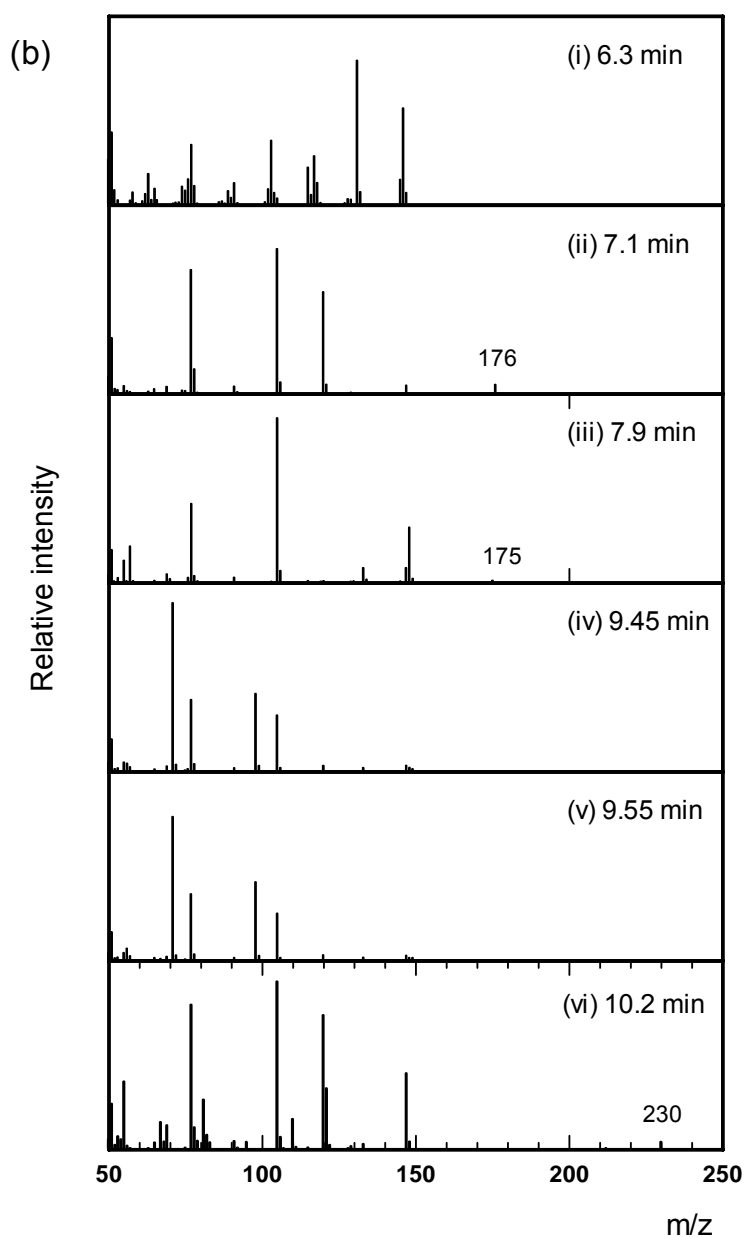

**Figure S1b** – GC-MS spectra of the product and by-products at the retention times indicated. (i) crotonophenone, molecular mass peak  $m/z = 146$ ; (ii) by-product 1, molecular mass peak  $m/z = 176$ ; (iii) by-product 2, molecular mass peak  $m/z = 175$ ; (iv) and (v) isomers of by-product 3 (see **Scheme 2** and **Figure S1a**) ; and (vi) 3-cyclohexyl-1-phenyl-1-butanone with principal MS peaks occurring at (EI+, 1.3 kV)  $m/z$  (peak intensity) = 230 (4, {M}), 147 (41), 120 (83), 105 (100), 91 (6), 77 (91), 67 (16), 55 (41).

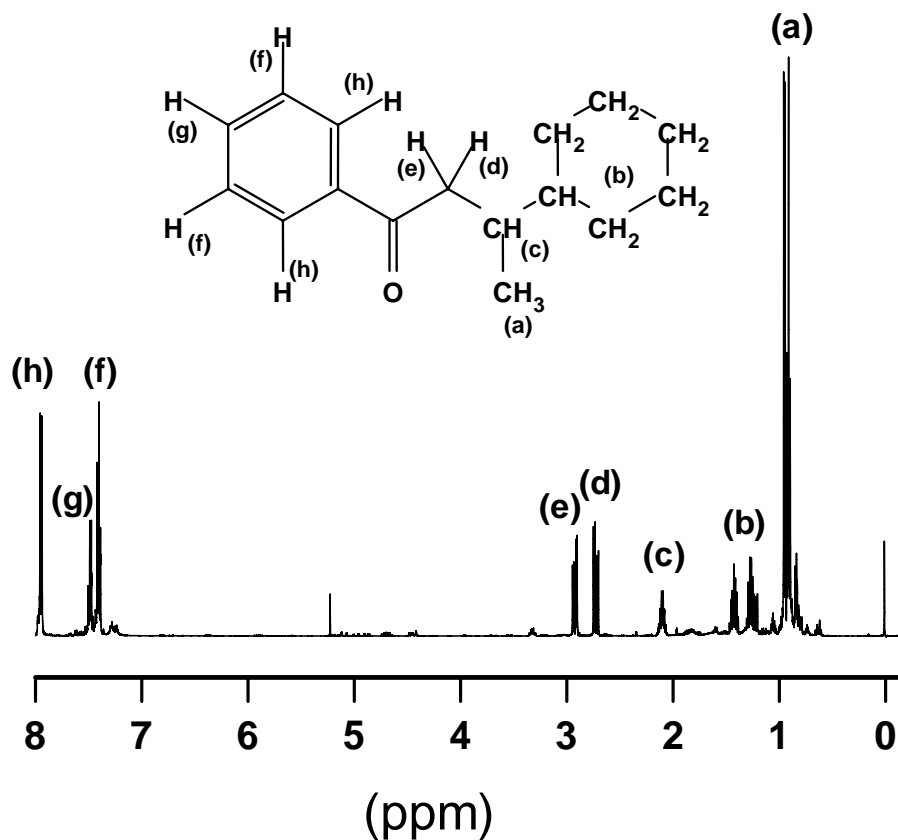

**Figure S2** – Proton NMR spectrum of the major fraction from the flash column chromatogram of products obtained in the synthesis and consistent with the major product being 3-cyclohexyl-1-phenyl-1-butanone (CPB): <sup>1</sup>H-NMR (500 MHz, CDCl<sub>3</sub>) δ (ppm): (a) 0.95–0.84 (d, 3H), (b) 1.42–1.24 (m, 11H), (c) 2.14–2.08 (m, 1H), (d) 2.74–2.69 (m, 1H), (e) 2.94–2.89 (m, 1H), (f) 7.41–7.38 (m, 2H), (g) 7.48–7.46 (m, 1H), (h) 7.94–7.93 (m, 2H). Note these assignments are consistent with the ones estimated using ChemNMR.
